# Supplementary material for: Facile synthesis of an urchin-like Sb2S3 nanostructure with high photocatalytic activity
Source: PubMed Central journal article supplement — RSC Adv. 2018 May 21;8(33):18451–5. doi: 10.1039/c7ra13392h (PMC9080533; doi:10.1039/c7ra13392h), 2018-05-21
Supplement: RA-008-C7RA13392H-s001.pdf [file RA-008-C7RA13392H-s001.pdf]

Electronic Supplementary Material (ESI) for RSC Advances.

## Facile Synthesis of Urchin-like Sb<sub>2</sub>S<sub>3</sub> Nanostructure with High Photocatalytic Activities

Jing Zhou\*, Jiangchun Chen, Mengyao Tang Yanqun Liu Xiaoyu Liu and Hua Wang \*

*College of Chemistry Engineering, Northeast Dianli University, Jilin 132012, P. R.China. E-mail: zhoujing@mail.nedu.edu.cn*

*School of Chemistry, Beihang University, Beijing 100191, P. R. China. E-mail: wanghua8651@buaa.edu.cn*

### Experimental part

**Material synthesis:** All reactants and solvents are in analytical grade and were used without further purification. In a typical synthesis, 1 mM potassium antimony tartrate and 2 mM thioacetamide were dissolved in 30 mL ethylene glycol. The solution was stirred strongly for about 30 min. And the whole solution was refluxed at 160 °C for 5 h. Finally, the dark-brown precipitate was centrifuged, washed with distilled water and absolute alcohol several times, and then dried at 60 °C for 3 h.

**Characterization:** The morphology and size of the as-synthesized product was observed directly by scanning electron microscopy (SEM, Quanta 250 FEG) with energy-dispersive X-ray spectroscopy (EDS). Transmission electron microscopy (TEM) and selected area electron diffraction (SAED) studies were performed using JEOL JEM-2100F electron microscopes. The phase composition of the as-prepared product was determined using a Rigaku Dmax 7000 X-ray diffraction (XRD), equipped with Cu K radiation of 1.5406 Å. The patterns were recorded at a scanning rate of 6°min<sup>-1</sup> from 10° up to 80°(2θ). Raman spectroscopy measurements were performed on LabRAM HR800 system. The UV-vis diffusive reflectance spectrum was performed in a UV-3600 spectrophotometer at room temperature using barium sulfate as the reference.

**Photocatalysis experiment:** The photocatalytic activity of the Sb<sub>2</sub>S<sub>3</sub>-based photocatalyst was investigated by degradation of MB dye under a 300 W Xe

lamp with UV cutoff filter (providing visible light with  $\lambda \geq 400$  nm). The photodegradation experiments were carried out at 25 °C in a cylindrical quartz vessel (200 mL) containing the  $\text{Sb}_2\text{S}_3$ -based photocatalyst (0.05 g) and MB solution (100 ml, 10, 20, 30, 40, 50, 60, 70  $\text{mgL}^{-1}$ ). Before exposure to the light, the solution with catalyst was stirred in the dark for 30 min to ensure an adsorption/desorption equilibrium between the  $\text{Sb}_2\text{S}_3$  nanostructure and organic dye molecules.

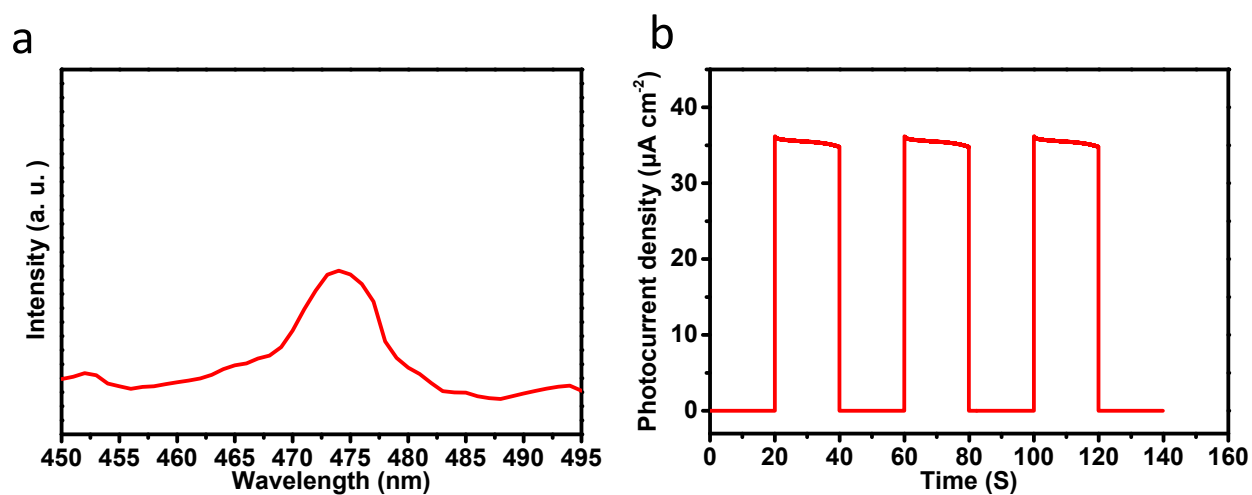

**Figure S1.** Photoluminescence emission (a) and photocurrent spectra (b) of as-prepared  $\text{Sb}_2\text{S}_3$

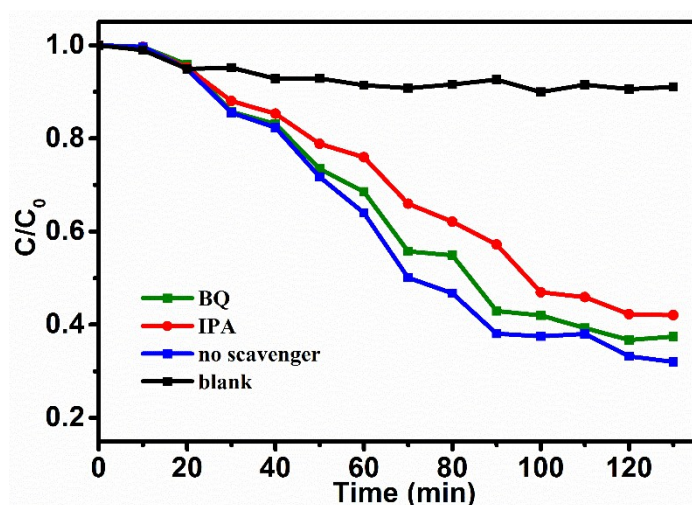

**Figure S2.** Photodegradation curve of MB dye without  $\text{Sb}_2\text{S}_3$  and Photodegradation curves of MB dye with added different scavengers over as-prepared  $\text{Sb}_2\text{S}_3$ .
